# Supplementary material for: Stable isotopic evidence of El Niño-like atmospheric circulation in the Pliocene western United States
Source: Copernicus journal article supplement (doi:10.5194/cp-9-903-2013), 2013-04-08
Supplement: Supplementary file 1 [file cp-9-903-2013-supplement.zip]

# Supplementary Information

## Modern ENSO $\delta^{18}\text{O}_{\text{precip}}$ Signals

While we incorporate over 10,000 separate weekly measurements of isotopes in precipitation in our analysis of modern ENSO signals, the time interval of observations is only 6 years and does not include large El Niño events such as took place in 1997-8. In order to validate these observed signals as features of ENSO teleconnections, we analyze model output of  $\delta^{18}\text{O}$  from the Stable Water Isotope Intercomparison Group (SWING) publically available on their website (<http://atoc.colorado.edu/~dcn/SWING/database.php>). We use data from the ECHAM-4 results of the S1b Experiment in which the model is forced with varying SST from the HadISST data set.

Seasonal El Niño  $\delta^{18}\text{O}$  anomalies based on the Niño 3.4 Index from 1950-2003 are shown in SFIG 1. In the winter (JFM), there are positive anomalies located in the Southwest and Northern US along with negative anomalies along the Southeast coast. This is in contrast to modern observations, which show negative anomalies along the West Coast. Similarly in the spring (AMJ), the Southwest and Northern US are characterized by positive anomalies. These regional signals match those observed in the modern dataset and are particularly relevant to the Southwest sites as is discussed in Section 4.1 of the main text. In the summer (JAS) there is a less coherent pattern of anomalies. Though small positive anomalies extend across portions of the Southern US, much of the US does not experience anomalies  $\delta^{18}\text{O}$  similar to the observational data. Finally in the fall (OND), the model shows a large zone of negative anomalies extending across the Southern US. This signal is shifted east compared to observational data, though the signals match over the Great Plains region. This is relevant to the Meade, KS site as discussed in Section 4.1 of the main text.

While there are some discrepancies between observed and modeled signals, there is very good agreement on the isotopic changes relevant to our discussion based on seasonality of carbonate formation at each locality (see discussion in main text). Therefore, we regard the isotopic anomalies observed in modern precipitation used in our analysis to be a robust feature of modern ENSO teleconnections.

1

## 2 **Pliocene Topography**

3 The isotope records presented do not appear to be primarily driven by changes in  
4 topography. In this section, we will describe the topographic environment of each site,  
5 expected signals of uplift, and previous research on regional topography. In addition, we  
6 present a new record of topography from the Southern Sierra Nevada.

7 Moisture that reaches Hagerman, ID is advected west from the Pacific across the  
8 Cascades and Columbia Plateau. As such, the site is located in a zone of relatively low  
9  $\delta^{18}\text{O}_{\text{precip}}$  that is representative of upstream orographic rainout to the west. Across the  
10 late Pliocene, we observe a  $\Delta\delta^{18}\text{O}$  of approximately 1‰, a signal that cannot be  
11 explained by the rise of upstream topography. Moreover, it has been shown that the  
12 Cascade Range developed in the mid-Miocene and the isotopic rain shadow has persisted  
13 since then (Kohn et al., 2002; Takeuchi and Larson, 2005; Takeuchi et al., 2010).

14 The Meade, KS locality is situated on the eastern edge of the central Rocky Mountains,  
15 and in terms of modern precipitation, the site is located within a steep  $\delta^{18}\text{O}$  gradient  
16 (Kendall and Coplen, 2001). We expect topographic rise to manifest as decreasing  $\delta^{18}\text{O}$   
17 values across the Pliocene with decreasing efficiency of moisture delivery to the western  
18 Great Plains from the Gulf of Mexico. Instead, we observe increasing  $\delta^{18}\text{O}$  values  
19 through the late Pliocene, similar to Hagerman, ID and at odds with rising topography.  
20 More importantly, however, the concept of rising of large-scale topography in this region  
21 is also in conflict with isotopic paleoaltimetry studies that have demonstrated the full  
22 development of modern  $\delta^{18}\text{O}$  gradients on the eastern edge of the Rockies by the late  
23 Eocene to Oligocene (39-29 Ma) (Mix et al., 2011; Chamberlain et al., 2012).

24 The Camp Rice, NM and St David, AZ isotopic records are located at the southern edge  
25 of the Colorado Plateau. While Camp Rice carbonates do not cover the late Pliocene, St  
26 David carbonates record decreasing  $\delta^{18}\text{O}$ , which could be interpreted as decreasing  
27 efficiency of inland moisture transport with rising topography. This would conflict with  
28 a number of studies, however, that have shown stable or decreasing Colorado Plateau  
29 elevations since the Paleogene (Horton and Chamberlain, 2006; Mix et al., 2011;

1   Huntington et al., 2010; Chamberlain et al., 2012).

2   The San Timoteo, CA section is located at the windward corner of the Transverse and

3   Peninsular ranges. There is sedimentological evidence that this region was tectonically

4   active throughout the Pliocene, though it is debated whether this entailed the uplift or

5   lateral translation of the Transverse Ranges (Albright, 1999; Weldon et al., 1993; Matti

6   and Morton, 1993). Based on empirical relationships between precipitation isotopes and

7   elevation (Poage and Chamberlain, 2001), the observed decrease in  $\delta^{18}\text{O}$  translates to

8   ~1.5 km uplift in 1 million years – a scenario that, to our knowledge has not been

9   proposed in previous research. This empirical relationship, however, is not valid at

10   windward positions. Uplift or lateral translation may account for a portion of the

11   observed signal through infiltration of high elevation waters to the lower, windward

12   section of the basin or by elevation-induced increases in upstream precipitation

13   (Galewsky, 2009). As the isotopic signals of these effects are reduced relative to the

14   empirical leeward relationship, we do not believe the amount of inferred uplift is

15   plausible (>3km); therefore, the observed signal cannot be fully explained by changes in

16   elevation.

17   Finally, conflicting evidence exists as to whether or not the Southern Sierra Nevada

18   experienced uplift through the Pliocene (e.g.: Chamberlain et al., 2012), which may have

19   impacted moisture delivery to the western US interior. In order to address this question,

20   we collected lacustrine carbonates from the Coso formation of Owens Lake Valley, CA

21   (Bacon et al., 1992) from 6 - 2 Ma located ~10km leeward of the Southern Sierra Nevada

22   (SFIG 2). Methods used to analyze isotopic values are described in Section 2.1, main

23   text, and isotopic values are included in Supplementary Table 1. This location is ideally

24   situated to study topographic uplift for two reasons: 1) A recent study of storm

25   trajectories has shown that moisture travelling inland will avoid pathways across high

26   elevation when possible, so that only locations immediately leeward of high elevation

27   will be isotopically sensitive to uplift (Lechler and Galewsky, 2013). 2) This location is

28   situated north of the large spring and fall El Niño  $\delta^{18}\text{O}$  anomalies and is therefore

29   insensitive to changes in the Pacific jet that may act to mask changes in uplift (FIG 3,

30   main text). We include this data in the supplement rather than the main text as it does not

1 pertain to El Niño signals and because minerals are lacustrine rather than pedogenic and  
2 as such reflect different formation processes.

3 The isotopic evolution of the Coso formation is displayed in SFIG 2. With progressive  
4 uplift through the Pliocene, we would expect to observe clearly decreasing  $\delta^{18}\text{O}$  on the  
5 order of 3-6‰ based on the empirical  $\delta^{18}\text{O}$  v. elevation relationship (Poage and  
6 Chamberlain, 2001) and depending on the amount of uplift (~1-2.5 km). Instead, we  
7 observe a slight trend of increasing  $\delta^{18}\text{O}$  from 5 - 3 Ma on the order of ~1‰ followed by  
8 even higher values from 2.5 – 2.0 Ma that range from -14 to -10‰. The anomalously  
9 high values suggest potential evaporative enrichment, concurrent with regional drying  
10 during this time period discussed in the main text. These data suggest stable topography  
11 in the Southern Sierra Nevada through the Pliocene epoch.

## 13 **References**

- 14 Albright, L. B.: Magnetostratigraphy and biochronology of the San Timoteo Badlands,  
15 southern California, with implications for local Pliocene-Pleistocene tectonic and  
16 depositional patterns, *Geol. Soc. Am. Bull.*, 111, 1265-1293, 1999.
- 17 Bacon, C. R., Giovanetti, D. M., Duffield, W. A., Dalrymple, G. B., Drake, R. E.: Age of  
18 the Coso formation, Inyo County, California. *Geological Survey Bulletin*, 1527, 1-18,  
19 1992.
- 20 Bonham, S., Haywood, A., Lunt, D., Collins, M., and Salzmann, U.: El Niño-Southern  
21 Oscillation, Pliocene climate and equifinality, *Philos. T. Roy. Soc. A.*, 367, 127-156,  
22 2009.
- 23 Chamberlain, C. P., Mix, H. T., Mulch, A., Hren, M. T., Kent-Corson, M. L., Davis, S. J.,  
24 Horton, T. W., and Graham, S.A.: The Cenozoic climatic and topographic evolution of  
25 the western North American Cordillera, *Am. J. Sci.*, 312, 213-262, 2012.
- 26 Galewsky, J.: Orographic precipitation isotopic ratios in stratified atmospheric flows:  
27 Implications for paleoelevation studies, *Geology*, 37, 791-794, 2009.
- 28 Horton, T. W. and Chamberlain, C. P.: Stable isotopic evidence for Neogene surface

1   downdrop in the central Basin and Range Province, *Geol. Soc. Am. Bull.*, 118, 475-490,  
2   2006.

3   Huntington, K. W., Wernicke, B. P., and Eiler, J. M.: Influence of climate change and  
4   uplift on Colorado Plateau paleotemperatures from carbonate clumped isotope  
5   thermometry, *Tectonics*, 29, TC3005, 2010.

6   Kendall, C. and Coplen, T.B.: Distribution of oxygen-18 and deuterium in river waters  
7   across the United States, *Hydrol. Process*, 15, 1363-1393, 2001.

8   Kohn, M. J., Miselis, J. L., and Fremd, T. J.: Oxygen isotope evidence for progressive  
9   uplift of the Cascade Range, Oregon, *Earth. Planet. Sc. Lett.*, 204, 151-165, 2002.

10   Lechler, A., Galewsky, J.: Refining Paleoaltimetry reconstructions of the Sierra Nevada,  
11   California, using air parcel trajectories, *Geology*, 41, 259-262, 2013.

12   Matti, J. C. and Morton, D. M.: Paleogeographic evolution of the San Andreas Fault in  
13   Southern California: A reconstruction based on a new cross-fault correlation, in: *The San*  
14   *Andreas fault system: Displacement, palinspastic reconstruction, and geologic evolution*,  
15   edited by: Powell, R. E., Weldon, R. J., and Matti, J. C., *Geol. Soc. Am. Mem.*, 178, 107–  
16   159, 1993.

17   Mix, H. T., Mulch, A., Kent-Corson, M. L., and Chamberlain C. P.: Cenozoic migration  
18   of topography in the North American Cordillera, *Geology*, 39, 87-90, 2011.

19   Poage, M. A. and Chamberlain, C. P.: Empirical relationships between elevation and the  
20   stable isotope composition of precipitation and surface waters: Considerations for studies  
21   of paleoelevation change, *Am. J. Sci.*, 301, 1-15, 2001.

22   Sohl, L. E., Chandler, M. A., Schmunk, R. B., Mankoff, K., Jonas, J. A., Foley, K. M.,  
23   and Dowsett, H. J.: PRISM3/GISS topographic reconstruction, U.S. Geological Survey  
24   Data Series, 419, 6 pp., 2009.

25   Takeuchi, A. and Larson, P. B.: Oxygen isotope evidence for the late Cenozoic  
26   development of an orographic rain shadow in eastern Washington, *Geology* 223, 127-146,  
27   2005.

1 Takeuchi, A., Hren, M. T., Smith, S. V., Chamberlain, C.P., and Larsen, P. B.: Pedogenic  
2 carbonate carbon isotopic constraints on paleoprecipitation: Evolution of desert in the  
3 Pacific Northwest, USA, in response to topographic development of the Cascade Range,  
4 Chemical Geology, 277, 323-335, 2010.

5 Weldon, R. J., Meisling, K. E., and Alexander, J.: A speculative history of the San  
6 Andreas Fault in the central Transverse Ranges, California, in: The San Andreas fault  
7 system: Displacement, palinspastic reconstruction, and geologic evolution, edited by:  
8 Powell, R. E., Weldon, R. J., and Matti, J. C., Geol. Soc. Am. Mem., 178, 161–198, 1993.

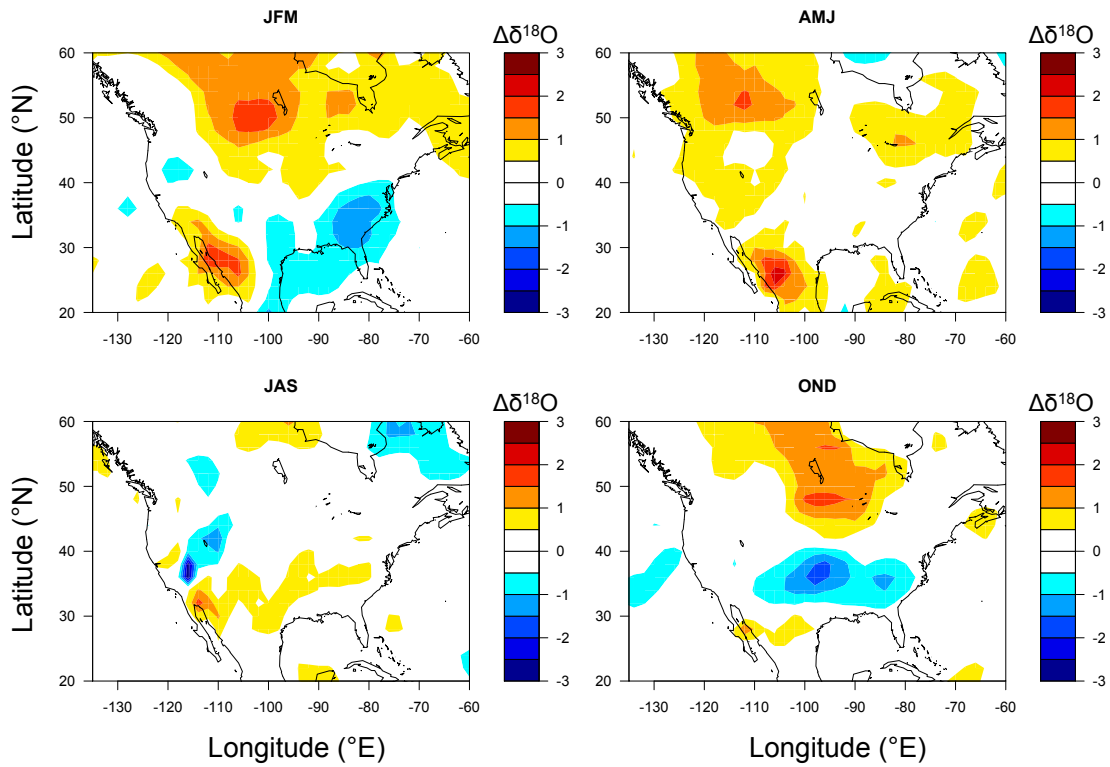

Supplementary Figure 1. Seasonal El Niño anomalies of modeled  $\delta^{18}\text{O}_{\text{precip}}$  based on the Niño 3.4 Index from 1950-2003. Isotope data taken from Stable Water Isotope Intercomparison Group (SWING) [reference in text].

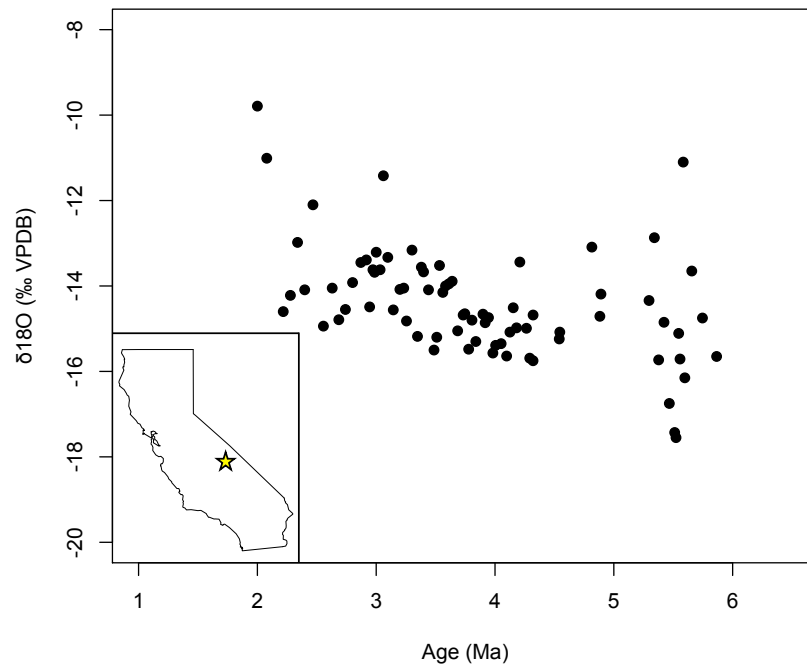

1  
2 Supplementary Figure 2.  $\delta^{18}\text{O}$  values measured in lactustrine carbonates from the Coso  
3 formation in Owens Valley, CA. The location is represented by the gold star in the inset.
