# Supplementary material for: Stable isotopic evidence of El Niño-like atmospheric circulation in the Pliocene western United States
Source: Copernicus journal article supplement (doi:10.5194/cp-9-903-2013), 2013-04-08
Supplement: Supplementary file 2 [file cp-9-903-2013-supplement.zip]

| Location     | Sample                         | Age (Ma) | $\delta^{18}\text{O}$ (‰ VPDB) |
|--------------|--------------------------------|----------|--------------------------------|
| Hagerman, ID | <b>Glenns Ferry Fm. Oolite</b> |          |                                |
|              | ID-CH 01-07                    | 3.83     | -17.83                         |
|              | ID-CH 02-07                    | 3.83     | -17.60                         |
|              | ID-CH 03-07                    | 3.82     | -16.79                         |
|              | ID-CH 04-07                    | 3.82     | -15.17                         |
|              | ID-CH 05-07                    | 3.81     | -16.64                         |
|              | ID-CH 06-07                    | 3.81     | -16.54                         |
|              | ID-CH 07-07                    | 3.80     | -15.75                         |
|              | ID-CH 08-07                    | 3.80     | -16.15                         |
|              | ID-CH 09-07                    | 3.79     | -16.66                         |
|              | ID-CH 10-07                    | 3.79     | -16.58                         |
|              | <b>Glenns Ferry Fm.</b>        |          |                                |
|              | ID-GF 01-07                    | 3.02     | -15.15                         |
|              | ID-GF 02-07                    | 3.03     | -15.54                         |
|              | ID-GF 03-07                    | 3.04     | -15.54                         |
|              | ID-GF 04-07                    | 3.05     | -15.54                         |
|              | <b>Hagerman Fossil Beds</b>    |          |                                |
|              | ID-HFB 01-07                   | 3.32     | -15.63                         |
|              | ID-HFB 02-07                   | 3.32     | -15.19                         |
|              | ID-HFB 03-07                   | 3.32     | -15.72                         |
|              | ID-HFB 05-07                   | 3.31     | -15.56                         |
|              | ID-HFB 06-07                   | 3.31     | -15.21                         |
|              | ID-HFB 07-07                   | 3.31     | -14.15                         |
|              | ID-HFB 08-07                   | 3.31     | -15.19                         |
|              | ID-HFB 09-07                   | 3.30     | -16.00                         |
|              | ID-HFB 10-07                   | 3.30     | -16.30                         |
|              | ID-HFB 11-07                   | 3.52     | -16.44                         |
|              | ID-HFB 12-07                   | 3.50     | -16.33                         |
|              | ID-HFB 13-07                   | 3.50     | -14.30                         |
|              | ID-HFB 14-07                   | 3.48     | -15.81                         |
|              | ID-HFB 15-07                   | 3.32     | -16.30                         |
|              | ID-HFB 16-07                   | 2.12     | -14.58                         |
|              | ID-HFB 17-07                   | 2.13     | -15.02                         |
|              | <b>Tuana Gravels Fm.</b>       |          |                                |
|              | TG 01-07                       | 2.00     | -15.82                         |
|              | TG 03-07                       | 2.01     | -15.42                         |
|              | TG 04-07                       | 2.02     | -15.65                         |
|              | TG 05-07                       | 2.02     | -15.15                         |
|              | TG 06-07                       | 2.02     | -15.83                         |
|              | TG 07-07                       | 2.07     | -15.37                         |

|                  |                          |             |        |
|------------------|--------------------------|-------------|--------|
|                  | TG 08-07                 | 2.08        | -15.69 |
|                  | TG 09-07                 | 2.13        | -14.84 |
|                  | TG 10-07                 | 2.13        | -14.64 |
|                  | <b>Bruneau Fm.</b>       |             |        |
|                  | ID-BF 04-07              | 1.92        | -15.68 |
|                  | ID-BF 05-07              | 1.92        | -16.03 |
|                  | ID-BF 06-07              | 1.92        | -15.86 |
|                  | ID-BF 07-07              | 1.92        | -15.38 |
|                  | ID-BF 08-07              | 1.92        | -15.46 |
| San Timoteo, CA  | <b>Jack Rabbit Trail</b> |             |        |
|                  | CA - 11 - 01             | 2.10        | -8.49  |
|                  | CA - 11 - 02             | 2.13        | -9.41  |
|                  | CA - 11 - 03             | 2.30        | -7.56  |
|                  | CA - 11 - 04             | 2.50        | -9.49  |
|                  | CA - 11 - 05             | 2.60        | -8.02  |
|                  | CA - 11 - 06             | 2.70        | -9.46  |
|                  | CA - 11 - 07             | 2.80        | -6.06  |
|                  | CA - 11 - 08             | 2.90        | -5.43  |
|                  | CA - 11 - 09             | 3.05        | -4.57  |
|                  | CA - 11 - 10             | 3.08        | -9.22  |
|                  | CA - 11 - 11             | 3.09        | -5.57  |
|                  | CA - 11 - 12             | 3.09        | -6.84  |
|                  | CA - 11 - 13             | 3.11        | -8.42  |
|                  | CA - 11 - 14             | 3.12        | -7.80  |
|                  | CA - 11 - 15             | 3.15        | -6.65  |
|                  | CA - 11 - 16             | 3.17        | -7.15  |
|                  | CA - 11 - 17             | 3.19        | -7.96  |
|                  | CA - 11 - 18             | 3.20        | -5.44  |
|                  | CA - 11 - 19             | 3.21        | -6.27  |
|                  | CA - 11 - 20             | 3.29        | -7.85  |
|                  | CA - 11 - 21             | 3.30        | -4.70  |
|                  | CA - 11 - 22             | 3.35        | -7.92  |
|                  | CA - 11 - 23             | 3.39        | -3.93  |
|                  | CA - 11 - 24             | 3.42        | -4.50  |
|                  | CA - 11 - 25             | 3.50        | -4.62  |
|                  | CA - 11 - 26             | 3.54        | -5.10  |
|                  | CA - 11 - 27             | 3.75        | -6.13  |
|                  | CA - 11 - 28             | 3.80        | -5.96  |
|                  | CA - 11 - 29             | 3.90        | -6.66  |
| Owens Valley, CA | <b>Coso Formation</b>    |             |        |
|                  | LC - 1                   | 5.865092749 | -15.65 |
|                  | LC - 2                   | 5.745924677 | -14.75 |

|         |             |        |
|---------|-------------|--------|
| LC - 3  | 5.655986509 | -13.65 |
| LC - 4  | 5.5975267   | -16.15 |
| LC - 5  | 5.557054525 | -15.71 |
| LC - 6  | 5.584035975 | -11.1  |
| LC - 7  | 5.545812254 | -15.11 |
| LC - 8  | 5.523327712 | -17.55 |
| LC - 9  | 5.512085441 | -17.43 |
| LC - 10 | 5.467116358 | -16.75 |
| LC - 11 | 5.422147274 | -14.85 |
| LC - 12 | 5.37717819  | -15.73 |
| LC - 13 | 5.341202923 | -12.87 |
| LC - 14 | 5.296233839 | -14.34 |
| LC - 15 | 4.891512085 | -14.19 |
| LC - 16 | 4.882518269 | -14.71 |
| LC - 17 | 4.815064643 | -13.09 |
| LC - 18 | 4.545250141 | -15.08 |
| LC - 19 | 4.540753232 | -15.24 |
| LC - 20 | 4.320404722 | -14.68 |
| UC - 1  | 4.32        | -15.75 |
| UC - 2  | 4.292215569 | -15.69 |
| UC - 3  | 4.264431138 | -14.99 |
| UC - 4  | 4.208862275 | -13.44 |
| UC - 5  | 4.181077844 | -14.98 |
| UC - 6  | 4.153293413 | -14.51 |
| UC - 7  | 4.125508982 | -15.08 |
| UC - 8  | 4.097724551 | -15.64 |
| UC - 9  | 4.051417166 | -15.35 |
| UC - 10 | 4.00510978  | -15.39 |
| UC - 11 | 3.981956088 | -15.57 |
| UC - 12 | 3.94491018  | -14.74 |
| UC - 13 | 3.917125749 | -14.86 |
| UC - 14 | 3.898602794 | -14.66 |
| UC - 15 | 3.838403194 | -15.3  |
| UC - 16 | 3.805988024 | -14.8  |
| UC - 17 | 3.778203593 | -15.48 |
| UC - 18 | 3.745788423 | -14.65 |
| UC - 19 | 3.731896208 | -14.68 |
| UC - 20 | 3.685588822 | -15.05 |
| UC - 21 | 3.639281437 | -13.89 |
| UC - 22 | 3.611497006 | -13.95 |
| UC - 23 | 3.583712575 | -14    |
| UC - 24 | 3.560558882 | -14.15 |

|         |             |        |
|---------|-------------|--------|
| UC - 25 | 3.532774451 | -13.52 |
| UC - 26 | 3.509620758 | -15.2  |
| UC - 27 | 3.486467066 | -15.5  |
| UC - 28 | 3.440159681 | -14.09 |
| UC - 29 | 3.398483034 | -13.67 |
| UC - 30 | 3.37996008  | -13.56 |
| UC - 31 | 3.34754491  | -15.18 |
| UC - 32 | 3.301237525 | -13.16 |
| UC - 33 | 3.25493014  | -14.82 |
| UC - 34 | 3.231776447 | -14.05 |
| UC - 35 | 3.199361277 | -14.08 |
| UC - 36 | 3.143792415 | -14.56 |
| UC - 37 | 3.09748503  | -13.33 |
| UC - 38 | 3.060439122 | -11.42 |
| UC - 39 | 3.032654691 | -13.62 |
| UC - 40 | 3.000239521 | -13.21 |
| UC - 41 | 2.986347305 | -13.68 |
| UC - 42 | 2.97245509  | -13.62 |
| UC - 43 | 2.944670659 | -14.49 |
| UC - 44 | 2.916886228 | -13.39 |
| UC - 45 | 2.870578842 | -13.45 |
| UC - 46 | 2.801117764 | -13.92 |
| UC - 47 | 2.740918164 | -14.55 |
| UC - 48 | 2.685349301 | -14.79 |
| UC - 49 | 2.629780439 | -14.05 |
| UC - 50 | 2.555688623 | -14.94 |
| UC - 51 | 2.467704591 | -12.1  |
| UC - 52 | 2.398243513 | -14.09 |
| UC - 53 | 2.338043912 | -12.98 |
| UC - 54 | 2.277844311 | -14.22 |
| UC - 55 | 2.217644711 | -14.6  |
| UC - 56 | 2.078722555 | -11.01 |
| UC - 57 | 2           | -9.79  |
