# Supplementary material for: Stable isotopic evidence of El Niño-like atmospheric circulation in the Pliocene western United States
Source: Copernicus journal article supplement (doi:10.5194/cp-9-903-2013), 2013-04-08
Supplement: Supplementary file 3 [file cp-9-903-2013-supplement.zip]

Archive with 4 entries (3 files):
- Supplementary Information 4_4_13.pdf
- __MACOSX/
- __MACOSX/._Supplementary Information 4_4_13.pdf
- Supplementary Table 1.pdf
